# Supplementary material for: Structural modification by adding Li cations into Mg/Cs-TFSA molten salt facilitating Mg electrodeposition
Source: Royal Society of Chemistry journal article supplement (doi:10.1039/c4ra13244k), 2014-12-03
Supplement: c4ra13244k1.pdf [file c4ra13244k1.pdf]

**Electronic supplementary information for**

**Structural modification by adding Li cations into Mg/Cs-TFSA molten salt  
facilitating Mg electrodeposition**

Koji Ohara,<sup>a,\*</sup> Yasuhiro Umebayashi,<sup>b</sup> Tetsu Ichitsubo,<sup>c</sup> Kazuhiko Matsumoto,<sup>d</sup>  
Rika Hagiwara,<sup>d</sup> Hajime Arai,<sup>a</sup> Masahiro Mori,<sup>a</sup> Yuki Orikasa,<sup>e</sup> Shinya Okamoto,<sup>c</sup>  
Masatsugu Oishi,<sup>f</sup> Yuka Aiso,<sup>d</sup> Toshiyuki Nohira,<sup>d</sup> Yoshiharu Uchimoto,<sup>e</sup>  
Zempachi Ogumi,<sup>a</sup> and Eiichiro Matsubara<sup>c</sup>

<sup>a</sup> Office of Society-Academia Collaboration for Innovation, Kyoto University,  
Gokasho, Uji, Kyoto 611-0011, Japan.

<sup>b</sup> Graduate School of Science and Technology, Niigata University,  
8050 Ikarashi 2-no-cho, Nishi-ku, Niigata City 950-2181, Japan.

<sup>c</sup> Department of Materials Science and Engineering, Kyoto University,  
Yoshida-honmachi, Sakyo-ku, Kyoto 606-8501, Japan.

<sup>d</sup> Graduate School of Energy Science, Kyoto University,  
Yoshida-honmachi, Sakyo-ku, Kyoto 606-8501, Japan.

<sup>e</sup> Graduate School of Human and Environmental Studies, Kyoto University, Yoshida-nihonmatsu-  
cho, Sakyo-ku, Kyoto 606-8501, Japan.

<sup>f</sup> Graduate School of Engineering, Kyoto University,  
Yoshida-honmachi, Sakyo-ku, Kyoto 606-8501, Japan.

The first peak observed at around 1.4 Å in Fig. S1 is assigned to N-S, S-O, S-C, and C-F bonds in the TFSA anion.<sup>1</sup> The second peak at around 2.1 Å is also assigned to O-O and F-F correlations. The third peak at around 2.7 Å is also assigned to N-O, N-C, S-F, and O-C correlations. Intriguingly, although the contribution of the intra-molecular atom-atom correlations is minor regardless of the composition, a clear difference was observed at these distances between atoms.

The shortest bond is the C-F correlation, as shown in Fig. S2(d). The peaks observed at around the first neighbor length within 2.0 Å are assigned to N-S, S-O, S-C, and C-F bonds. Each bond is independent of the composition dependence. The other  $g_{ij}(r)$  beyond the first neighbor covalent bond on the TFSA anion are shown in Fig. S3. It is confirmed that the S-S correlation clearly changed with the ratio of *cis*- and *trans*-conformers in the TFSA anion.

We calculated the average coordination numbers up to 4.0 Å, as summarized in Table S1. The integral maximum distance of 4.0 Å was determined as the distance of the clear structural change from the experimental  $g(r)$  in Fig. S1. These coordination numbers are not equal to the numbers of ionic bonds. The average coordination number of the anion around the cation,  $N_{\text{Cation-N}}$ , shows the composition dependence. Regarding  $N_{\text{Cs-N}}$ , only  $\text{Cs}_{1.0}[\text{TFSA}]_{1.0}$  gives a small coordination number, which is consistent with  $g_{\text{Cs-N}}(r)$ , as shown in Fig. 3 (c). The  $N_{\text{Mg-N}}$  in  $\text{Mg}_{0.1}\text{Cs}_{0.9}[\text{TFSA}]_{1.1}$  is twice as large as  $N_{\text{Cs-N}}$ , which corresponds to the differences in the charge and size between the  $\text{Mg}^{2+}$  and  $\text{Cs}^+$  ions. However, this relationship is not retained in  $\text{Li}_{0.1}\text{Mg}_{0.1}\text{Cs}_{0.8}[\text{TFSA}]_{1.1}$ .

The  $N_{\text{cation-cation}}$  are shown in the four lines from the bottom in Table S1. The  $N_{\text{Cs-Cs}}$  decreases with adding  $\text{Li}^+$  or/and  $\text{Mg}^{2+}$  contents. The fractions of  $N_{\text{Cs-Li}}$ ,  $N_{\text{Cs-Mg}}$ , and  $N_{\text{Mg-Li}}$  are almost constant in these compositions.

## Figures

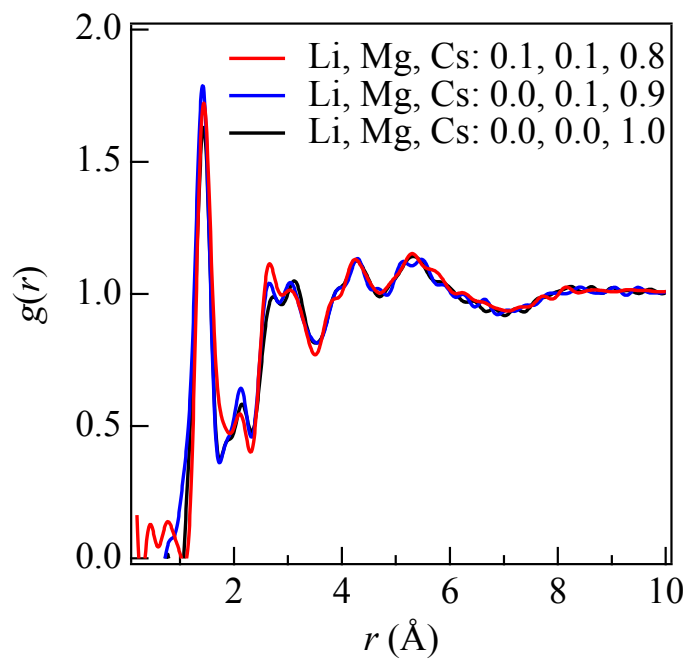

Fig. S1 Pair distribution functions  $g(r)$  for alkali TFSA molten salts at 438 K. Line colours correspond to those in Figure 1.

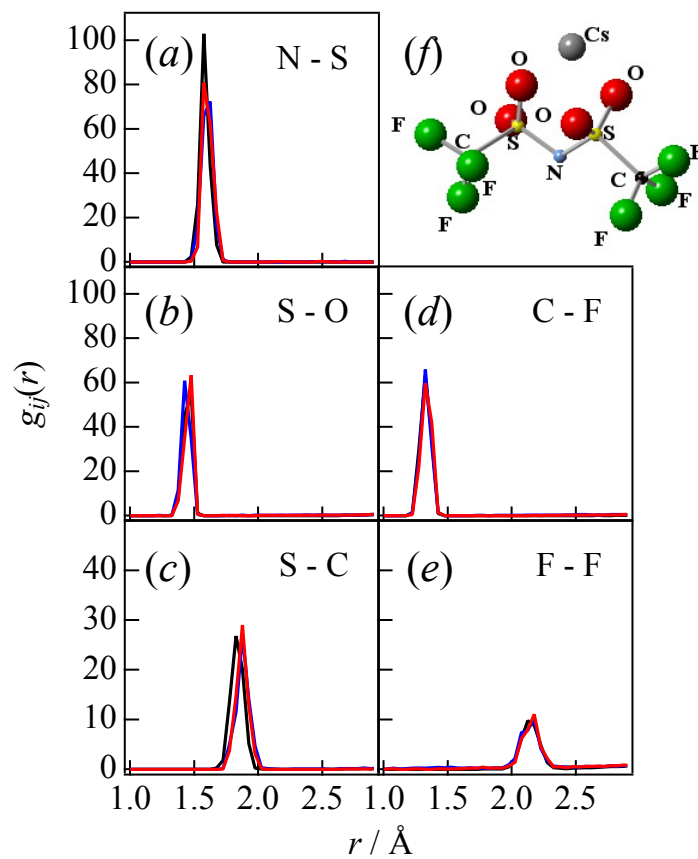

Fig. S2 Partial pair distribution functions  $g_{ij}(r)$  for alkali TFSA molten salts at  $r < 2.3 \text{ \AA}$  obtained by the RMC-MM simulation (a-e). A TFSA anion model (f) in the RMC-MM. Line colours correspond to those in Figure 1.

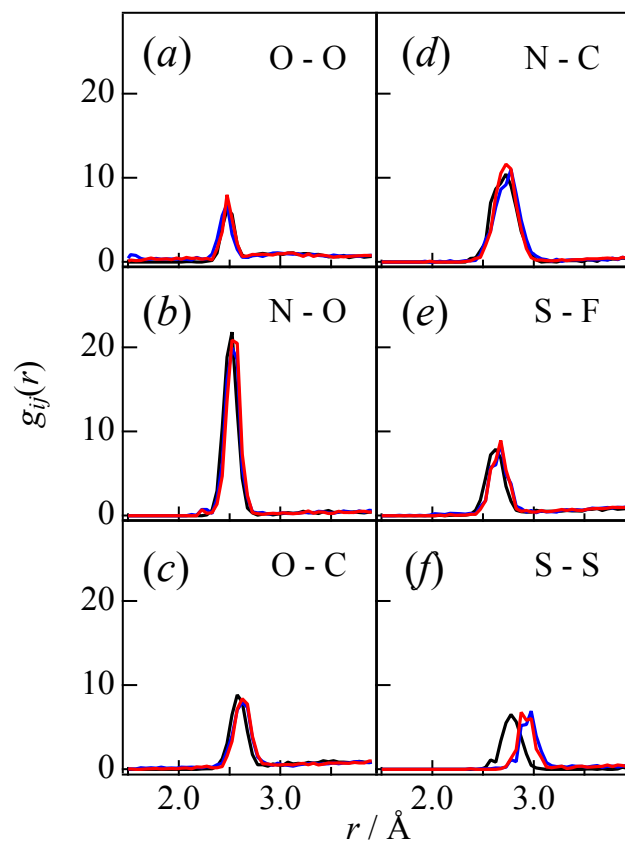

Fig. S3 Partial pair correlation functions  $g_{ij}(r)$  for alkali TFSA molten salts at around  $r = 2.7 \text{\AA}$  obtained by RMC-MM simulation (a-f). Line colours correspond to those in Figure 1.

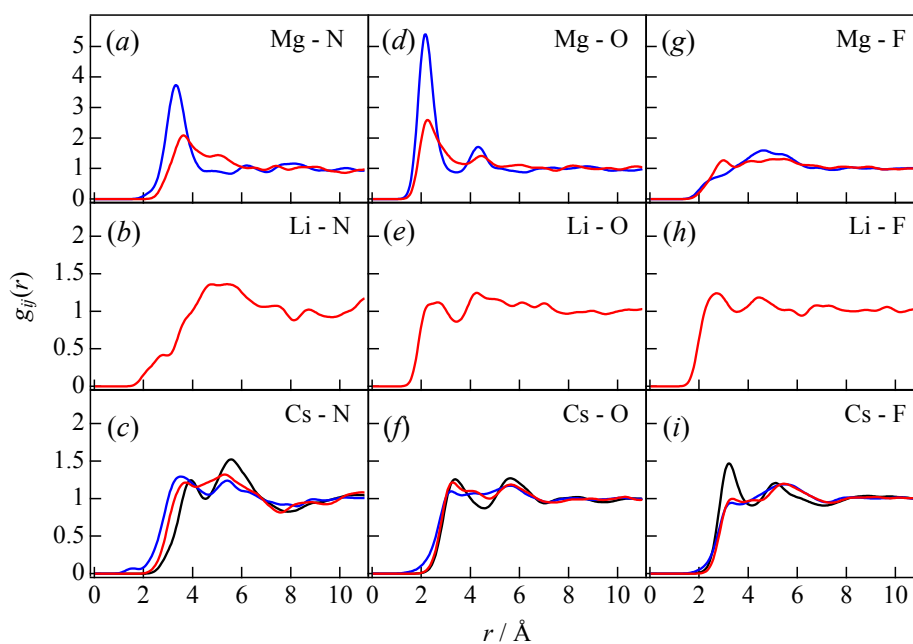

Fig. S4 Pair distribution functions,  $g(r)$ , for Mg-N (a), Li-N (b), Cs-N (c), Mg-O (d), Li-O (e), Cs-O (f), Mg-F (g), Li-F (h), and Cs-F (i) derived using the RMC-MM models for alkali TFSA molten salts. Line colours correspond to those in Figure 1.

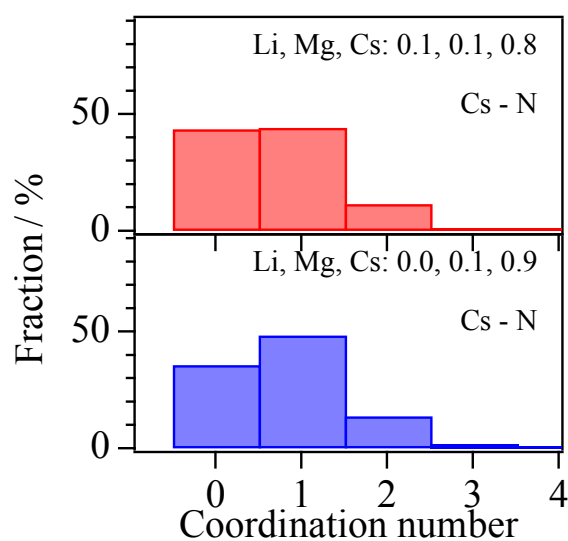

Fig. S5 Coordination number statistics for alkali TFSA molten salts obtained using the RMC-MM model. Normalized fractions of Cs – N coordination numbers within 4.0 Å.

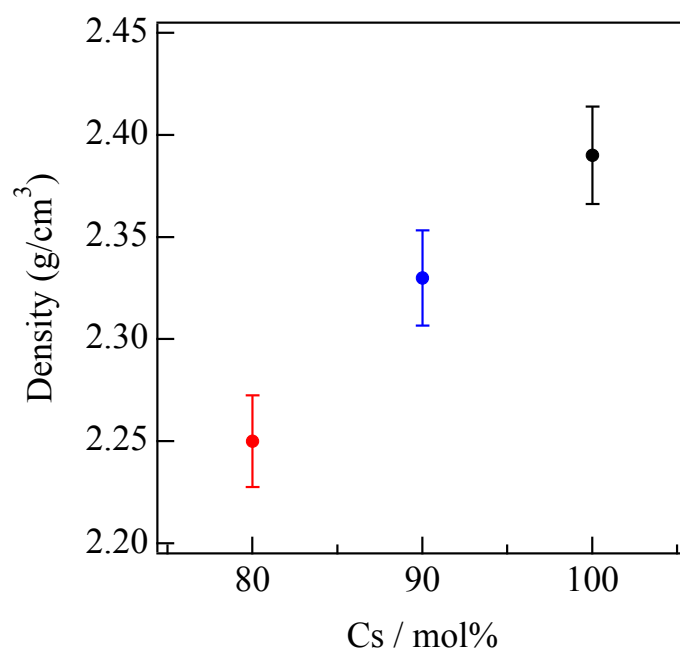

Fig. S6 Density of alkali TFSA molten salts at 438 K measured using a graduated cylinder. Circle colours correspond to those in Figure 1.

Table S1. Average coordination numbers in alkali TFSA molten salts at  $r < 4.0 \text{ \AA}$  obtained using the RMC-MM models.  $N_{i-j}$ : partial coordination number of  $j$  atoms around  $i$  atoms ( $N_{j-i}$  in parentheses).

| Li, Mg, Cs         | 0.0, 0.0, 1.0  | 0.0, 0.1, 0.9  | 0.1, 0.1, 0.8  |
|--------------------|----------------|----------------|----------------|
| $N_{\text{Cs-N}}$  | 0.55<br>(0.53) | 0.82<br>(0.67) | 0.70<br>(0.51) |
| $N_{\text{Li-N}}$  | -              | -              | 0.50<br>(0.05) |
| $N_{\text{Mg-N}}$  | -              | 1.56<br>(0.14) | 1.10<br>(0.10) |
| $N_{\text{Cs-Cs}}$ | 0.53           | 0.21           | 0.18           |
| $N_{\text{Cs-Li}}$ | -              | -              | 0.11<br>(0.84) |
| $N_{\text{Cs-Mg}}$ | -              | 0.05<br>(0.46) | 0.05<br>(0.36) |
| $N_{\text{Mg-Li}}$ | -              | -              | 0.08<br>(0.08) |
| $N_{\text{N-N}}$   | 0.13           | 0.10           | 0.11           |

## Reference

1. Bodo, E.; Gontrani, L.; Caminiti, R.; Plechkova, N. V.; Seddon, K. R. and Triolo, A., Structural Properties of 1-Alkyl-3-methylimidazolium Bis{(trifluoromethyl)sulfonyl}amide Ionic Liquids: X-ray Diffraction Data and Molecular Dynamics Simulations, *J. Phys. Chem. B*, 2010, **114**, 16398-16407.
